# Supplementary material for: Hexosamine Biosynthetic Pathway Inhibition Leads to AML Cell Differentiation and Cell Death
Source: Oxford University Press journal article supplement (doi:10.1158/1535-7163.mct-18-0426), 2018-08-06
Supplement: 15357163mct180426-sup-200658_2_supp_4886784_pbpr39.pdf [file 15357163mct180426-sup-200658_2_supp_4886784_pbpr39.pdf]

## FIGURE S5

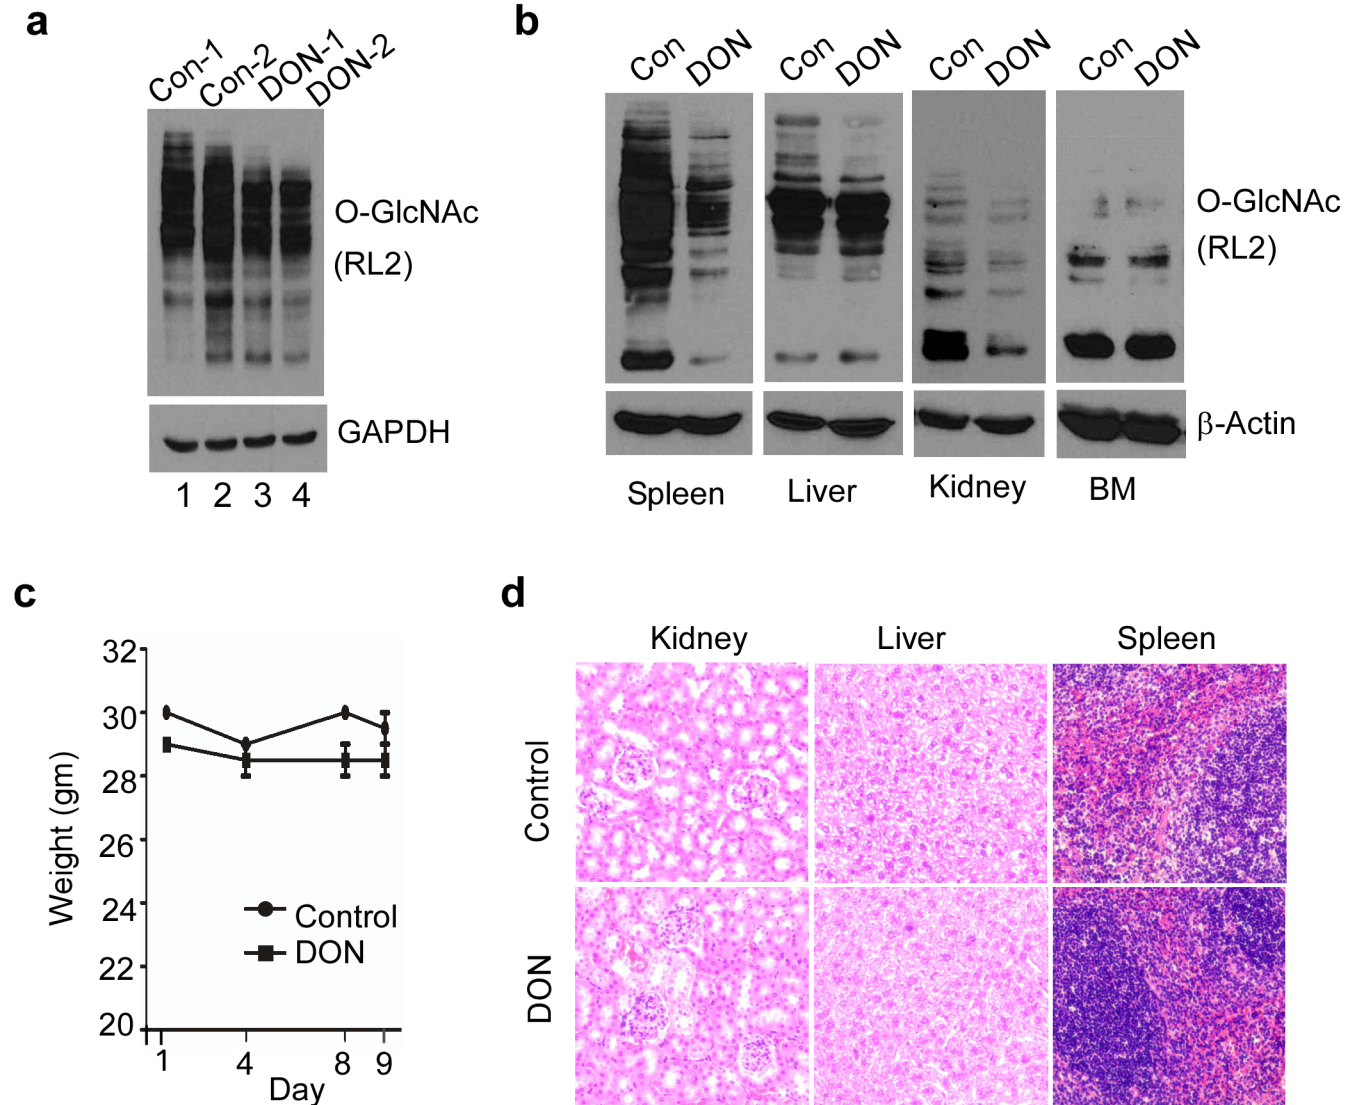

**Figure S5. In vivo evaluation of DON administration.**

(a) Western blot of sub-cutaneous tumor extracted from control and DON treated HL-60 based xenograft mice (as per schematics from figure 6a) was probed for O-GlcNAc and GAPDH.

(b) Normal C57BL mice treated with 3 i.p. DON (0.65 mg/kg) doses or PBS (control), each with 3 day time interval difference. Mice were sacrificed 24 hr after last DON injection and different organs were probed for O-GlcNAc levels by western blot. Actin was used as endogenous control.

(c) Represents weight profile of normal C57BL mice on indicated days.

(d) H&E staining in kidney, liver and spleen from control or DON administered C57BL mice treated with 3 i.p. DON administration compared to control.
