# Supplementary material for: Hexosamine Biosynthetic Pathway Inhibition Leads to AML Cell Differentiation and Cell Death
Source: Oxford University Press journal article supplement (doi:10.1158/1535-7163.mct-18-0426), 2018-08-06
Supplement: 15357163mct180426-sup-200658_2_supp_4886790_pbpr34.pdf [file 15357163mct180426-sup-200658_2_supp_4886790_pbpr34.pdf]

FIGURE S3

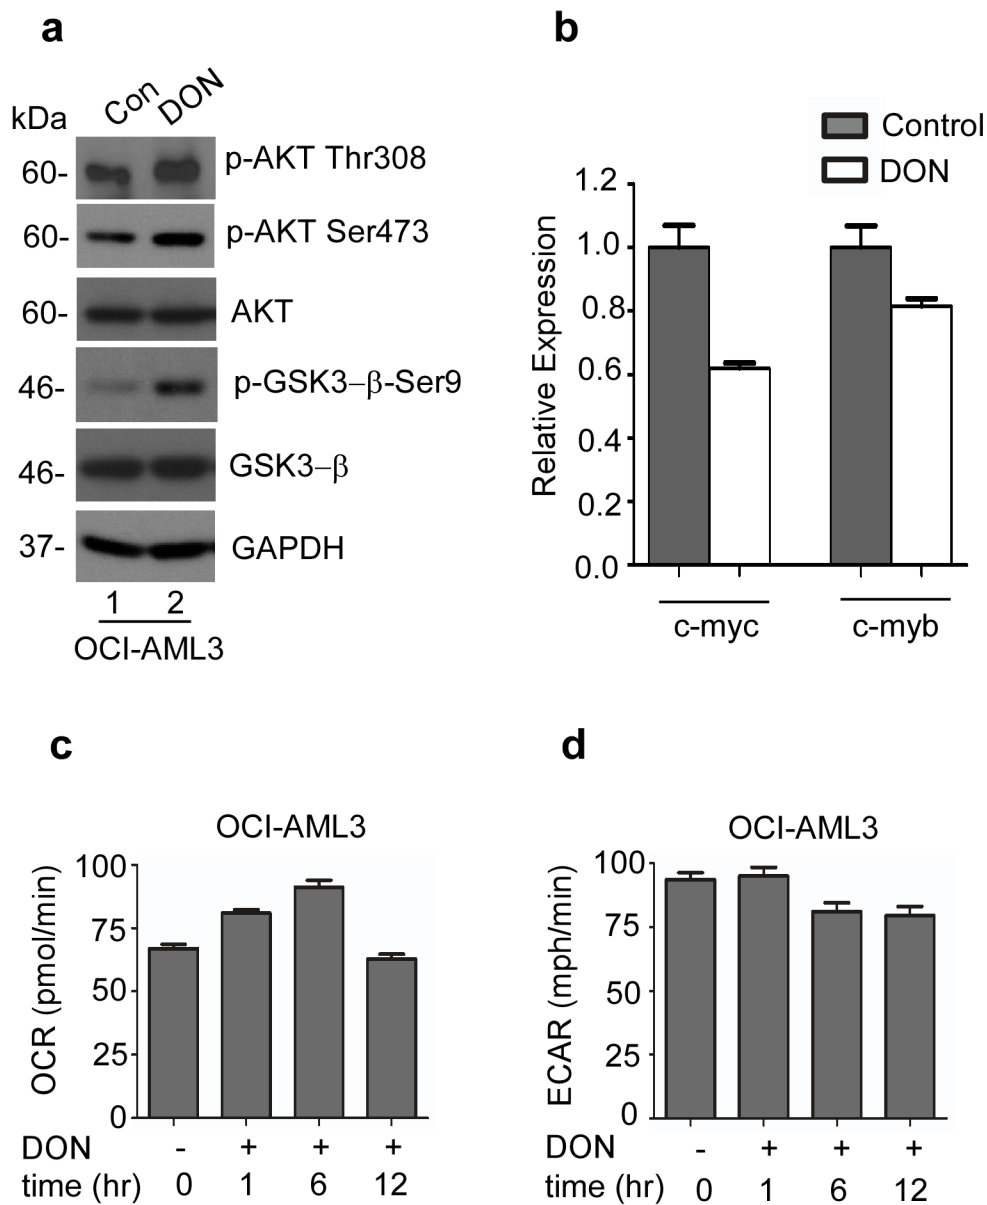

**Figure S3. HBP inhibition affects phosphorylation of target protein, expression of transcription factors and cause minor change in cellular metabolism.**

(a) Western blot analysis of OCI-AML3 cells in the absence or presence of DON (50  $\mu$ M) probed for residue specific phosphorylation in Akt and GSK3 $\beta$  protein. GAPDH was used as an endogeneous control. (b) Real time-PCR based relative transcript expression of c-myc and c-myb gene in OCI-AML3 cells in the absence or presence of DON (50  $\mu$ M) after 24 hr. (c) Parameter of cellular metabolism Oxygen Consumption Rate (OCR) and (d) Extracellular Acidification Rate (ECAR) was monitored in OCI-AML3 cells. Cells were pre-incubated with DON (50  $\mu$ M) for 1 hr, 6 hr and 12 hr followed by measurement in a XF96 Seahorse bioanalyzer as indicated. DON concentration was maintained during the course of experiment. Control cells were left untreated.
